# Supplementary material for: Single-molecule sequencing and optical mapping yields an improved genome of woodland strawberry (Fragaria vesca) with chromosome-scale contiguity
Source: PubMed Central journal article supplement (PMC5801600; doi:10.1093/gigascience/gix124), 2017-12-13

# GigaScience

## Single-molecule sequencing and optical mapping yields an improved genome of woodland strawberry (*Fragaria vesca*) with chromosome-scale contiguity

--Manuscript Draft--

|                                                      |                                                                                                                                                                                                                                                                                                                                                                                                                                                                                                                                                                                                                                                                                                                                                                                                                                                                                                                                                                                                                                                                                                                                                                                                                                                                                                                                                                                                                                                            |                  |
|------------------------------------------------------|------------------------------------------------------------------------------------------------------------------------------------------------------------------------------------------------------------------------------------------------------------------------------------------------------------------------------------------------------------------------------------------------------------------------------------------------------------------------------------------------------------------------------------------------------------------------------------------------------------------------------------------------------------------------------------------------------------------------------------------------------------------------------------------------------------------------------------------------------------------------------------------------------------------------------------------------------------------------------------------------------------------------------------------------------------------------------------------------------------------------------------------------------------------------------------------------------------------------------------------------------------------------------------------------------------------------------------------------------------------------------------------------------------------------------------------------------------|------------------|
| <b>Manuscript Number:</b>                            | GIGA-D-17-00135R2                                                                                                                                                                                                                                                                                                                                                                                                                                                                                                                                                                                                                                                                                                                                                                                                                                                                                                                                                                                                                                                                                                                                                                                                                                                                                                                                                                                                                                          |                  |
| <b>Full Title:</b>                                   | Single-molecule sequencing and optical mapping yields an improved genome of woodland strawberry ( <i>Fragaria vesca</i> ) with chromosome-scale contiguity                                                                                                                                                                                                                                                                                                                                                                                                                                                                                                                                                                                                                                                                                                                                                                                                                                                                                                                                                                                                                                                                                                                                                                                                                                                                                                 |                  |
| <b>Article Type:</b>                                 | Data Note                                                                                                                                                                                                                                                                                                                                                                                                                                                                                                                                                                                                                                                                                                                                                                                                                                                                                                                                                                                                                                                                                                                                                                                                                                                                                                                                                                                                                                                  |                  |
| <b>Funding Information:</b>                          | USDA-HATCH (1009804)                                                                                                                                                                                                                                                                                                                                                                                                                                                                                                                                                                                                                                                                                                                                                                                                                                                                                                                                                                                                                                                                                                                                                                                                                                                                                                                                                                                                                                       | Dr Patrick Edger |
|                                                      | Directorate for Biological Sciences (MCB-1121650)                                                                                                                                                                                                                                                                                                                                                                                                                                                                                                                                                                                                                                                                                                                                                                                                                                                                                                                                                                                                                                                                                                                                                                                                                                                                                                                                                                                                          | Dr Ning Jiang    |
| <b>Abstract:</b>                                     | <p>Although draft genomes are available for most agronomically important plant species, the majority are incomplete, highly fragmented, and often riddled with assembly and scaffolding errors. These assembly issues hinder advances in tool development for functional genomics and systems biology. Here we utilized a robust, cost-effective approach to produce high-quality reference genomes. We report a near-complete genome of diploid woodland strawberry (<i>Fragaria vesca</i>) using single-molecule real-time sequencing from Pacific Biosciences (PacBio). This assembly has a contig N50 length of ~7.9 Mb, representing a ~300 fold improvement of the previous version. The vast majority (&gt;99.8%) of the assembly was anchored to seven pseudomolecules using two sets of optical maps from Bionano Genomics. We obtained ~24.96 million base pairs (Mb) of sequence not present in the previous version of the <i>F. vesca</i> genome and produced an improved annotation that includes 1,496 new genes. Comparative syntenic analyses uncovered numerous, large-scale scaffolding errors present in each chromosome in the previously published version of the <i>F. vesca</i> genome. Our results highlight the need to improve existing short-read based reference genomes. Furthermore, we demonstrate how genome quality impacts commonly used analyses for addressing both fundamental and applied biological questions.</p> |                  |
| <b>Corresponding Author:</b>                         | Patrick Edger<br>Michigan State University<br>UNITED STATES                                                                                                                                                                                                                                                                                                                                                                                                                                                                                                                                                                                                                                                                                                                                                                                                                                                                                                                                                                                                                                                                                                                                                                                                                                                                                                                                                                                                |                  |
| <b>Corresponding Author Secondary Information:</b>   |                                                                                                                                                                                                                                                                                                                                                                                                                                                                                                                                                                                                                                                                                                                                                                                                                                                                                                                                                                                                                                                                                                                                                                                                                                                                                                                                                                                                                                                            |                  |
| <b>Corresponding Author's Institution:</b>           | Michigan State University                                                                                                                                                                                                                                                                                                                                                                                                                                                                                                                                                                                                                                                                                                                                                                                                                                                                                                                                                                                                                                                                                                                                                                                                                                                                                                                                                                                                                                  |                  |
| <b>Corresponding Author's Secondary Institution:</b> |                                                                                                                                                                                                                                                                                                                                                                                                                                                                                                                                                                                                                                                                                                                                                                                                                                                                                                                                                                                                                                                                                                                                                                                                                                                                                                                                                                                                                                                            |                  |
| <b>First Author:</b>                                 | Patrick Edger                                                                                                                                                                                                                                                                                                                                                                                                                                                                                                                                                                                                                                                                                                                                                                                                                                                                                                                                                                                                                                                                                                                                                                                                                                                                                                                                                                                                                                              |                  |
| <b>First Author Secondary Information:</b>           |                                                                                                                                                                                                                                                                                                                                                                                                                                                                                                                                                                                                                                                                                                                                                                                                                                                                                                                                                                                                                                                                                                                                                                                                                                                                                                                                                                                                                                                            |                  |
| <b>Order of Authors:</b>                             | Patrick Edger                                                                                                                                                                                                                                                                                                                                                                                                                                                                                                                                                                                                                                                                                                                                                                                                                                                                                                                                                                                                                                                                                                                                                                                                                                                                                                                                                                                                                                              |                  |
|                                                      | Robert VanBuren                                                                                                                                                                                                                                                                                                                                                                                                                                                                                                                                                                                                                                                                                                                                                                                                                                                                                                                                                                                                                                                                                                                                                                                                                                                                                                                                                                                                                                            |                  |
|                                                      | Marivi Colle                                                                                                                                                                                                                                                                                                                                                                                                                                                                                                                                                                                                                                                                                                                                                                                                                                                                                                                                                                                                                                                                                                                                                                                                                                                                                                                                                                                                                                               |                  |
|                                                      | Thomas Poorten                                                                                                                                                                                                                                                                                                                                                                                                                                                                                                                                                                                                                                                                                                                                                                                                                                                                                                                                                                                                                                                                                                                                                                                                                                                                                                                                                                                                                                             |                  |
|                                                      | Ching Man Wai                                                                                                                                                                                                                                                                                                                                                                                                                                                                                                                                                                                                                                                                                                                                                                                                                                                                                                                                                                                                                                                                                                                                                                                                                                                                                                                                                                                                                                              |                  |
|                                                      | Chad Niederhuth                                                                                                                                                                                                                                                                                                                                                                                                                                                                                                                                                                                                                                                                                                                                                                                                                                                                                                                                                                                                                                                                                                                                                                                                                                                                                                                                                                                                                                            |                  |
|                                                      | Elizabeth I Alger                                                                                                                                                                                                                                                                                                                                                                                                                                                                                                                                                                                                                                                                                                                                                                                                                                                                                                                                                                                                                                                                                                                                                                                                                                                                                                                                                                                                                                          |                  |
|                                                      | Shujun Ou                                                                                                                                                                                                                                                                                                                                                                                                                                                                                                                                                                                                                                                                                                                                                                                                                                                                                                                                                                                                                                                                                                                                                                                                                                                                                                                                                                                                                                                  |                  |
|                                                      | Charlotte Acharya                                                                                                                                                                                                                                                                                                                                                                                                                                                                                                                                                                                                                                                                                                                                                                                                                                                                                                                                                                                                                                                                                                                                                                                                                                                                                                                                                                                                                                          |                  |
|                                                      | Jie Wang                                                                                                                                                                                                                                                                                                                                                                                                                                                                                                                                                                                                                                                                                                                                                                                                                                                                                                                                                                                                                                                                                                                                                                                                                                                                                                                                                                                                                                                   |                  |

|                                                                                                                                                                                                                                                                                                                                                                                                                                                                                               |                                                                                                                                                             |
|-----------------------------------------------------------------------------------------------------------------------------------------------------------------------------------------------------------------------------------------------------------------------------------------------------------------------------------------------------------------------------------------------------------------------------------------------------------------------------------------------|-------------------------------------------------------------------------------------------------------------------------------------------------------------|
|                                                                                                                                                                                                                                                                                                                                                                                                                                                                                               | Pete Callow                                                                                                                                                 |
|                                                                                                                                                                                                                                                                                                                                                                                                                                                                                               | Michael McKain                                                                                                                                              |
|                                                                                                                                                                                                                                                                                                                                                                                                                                                                                               | Jinghua Shi                                                                                                                                                 |
|                                                                                                                                                                                                                                                                                                                                                                                                                                                                                               | Chad Collier                                                                                                                                                |
|                                                                                                                                                                                                                                                                                                                                                                                                                                                                                               | Zhiyong Xiong                                                                                                                                               |
|                                                                                                                                                                                                                                                                                                                                                                                                                                                                                               | Jeffrey Mower                                                                                                                                               |
|                                                                                                                                                                                                                                                                                                                                                                                                                                                                                               | Janet Slovin                                                                                                                                                |
|                                                                                                                                                                                                                                                                                                                                                                                                                                                                                               | Timo Hytönen                                                                                                                                                |
|                                                                                                                                                                                                                                                                                                                                                                                                                                                                                               | Ning Jiang                                                                                                                                                  |
|                                                                                                                                                                                                                                                                                                                                                                                                                                                                                               | Kevin Childs                                                                                                                                                |
|                                                                                                                                                                                                                                                                                                                                                                                                                                                                                               | Steven Knapp                                                                                                                                                |
| <b>Order of Authors Secondary Information:</b>                                                                                                                                                                                                                                                                                                                                                                                                                                                |                                                                                                                                                             |
| <b>Response to Reviewers:</b>                                                                                                                                                                                                                                                                                                                                                                                                                                                                 | Dear Reviewers and Editor,<br><br>Thank you again for all of the helpful comments! The manuscript has been significantly improved thanks to you.<br><br>Pat |
| <b>Additional Information:</b>                                                                                                                                                                                                                                                                                                                                                                                                                                                                |                                                                                                                                                             |
| <b>Question</b>                                                                                                                                                                                                                                                                                                                                                                                                                                                                               | <b>Response</b>                                                                                                                                             |
| Are you submitting this manuscript to a special series or article collection?                                                                                                                                                                                                                                                                                                                                                                                                                 | No                                                                                                                                                          |
| <b>Experimental design and statistics</b><br><br>Full details of the experimental design and statistical methods used should be given in the Methods section, as detailed in our <a href="#">Minimum Standards Reporting Checklist</a> . Information essential to interpreting the data presented should be made available in the figure legends.<br><br>Have you included all the information requested in your manuscript?                                                                  | Yes                                                                                                                                                         |
| <b>Resources</b><br><br>A description of all resources used, including antibodies, cell lines, animals and software tools, with enough information to allow them to be uniquely identified, should be included in the Methods section. Authors are strongly encouraged to cite <a href="#">Research Resource Identifiers</a> (RRIDs) for antibodies, model organisms and tools, where possible.<br><br>Have you included the information requested as detailed in our <a href="#">Minimum</a> | Yes                                                                                                                                                         |

|                                                                                                                                                                                                                                                                                                                                                                                                                                                                                                                                                         |     |
|---------------------------------------------------------------------------------------------------------------------------------------------------------------------------------------------------------------------------------------------------------------------------------------------------------------------------------------------------------------------------------------------------------------------------------------------------------------------------------------------------------------------------------------------------------|-----|
| <a href="#">Standards Reporting Checklist?</a>                                                                                                                                                                                                                                                                                                                                                                                                                                                                                                          |     |
| <p><b>Availability of data and materials</b></p> <p>All datasets and code on which the conclusions of the paper rely must be either included in your submission or deposited in <a href="#">publicly available repositories</a> (where available and ethically appropriate), referencing such data using a unique identifier in the references and in the “Availability of Data and Materials” section of your manuscript.</p> <p>Have you have met the above requirement as detailed in our <a href="#">Minimum Standards Reporting Checklist?</a></p> | Yes |

**Title:** Single-molecule sequencing and optical mapping yields an improved genome of woodland strawberry (*Fragaria vesca*) with chromosome-scale contiguity

**Authors:** Patrick P. Edger<sup>a,b,1,2</sup>, Robert VanBuren<sup>a,1</sup>, Marivi Colle<sup>a</sup>, Thomas J. Poorten<sup>c</sup>, Ching Man Wai<sup>a</sup>, Chad E. Niederhuth<sup>d</sup>, Elizabeth I. Alger<sup>a</sup>, Shujun Ou<sup>a,b</sup>, Charlotte B. Acharya<sup>c</sup>, Jie Wang<sup>e</sup>, Pete Callow<sup>a</sup>, Michael R. McKain<sup>f</sup>, Jinghua Shi<sup>g</sup>, Chad Collier<sup>g</sup>, Zhiyong Xiong<sup>h</sup>, Jeffrey P. Mower<sup>i</sup>, Janet P. Slovin<sup>j</sup>, Timo Hytönen<sup>k</sup>, Ning Jiang<sup>a,b</sup>, Kevin L. Childs<sup>e,l</sup>, Steven J. Knapp<sup>c,2</sup>

a. Department of Horticulture, Michigan State University, East Lansing, MI

b. Ecology, Evolutionary Biology, and Behavior, Michigan State University, East Lansing, MI

c. Department of Plant Sciences, University of California - Davis, Davis, CA

d. Department of Genetics, University of Georgia, Athens, GA

e. Department of Plant Biology, Michigan State University, East Lansing, MI

f. Donald Danforth Plant Science Center, St. Louis, MO

g. Bionano Genomics, San Diego, CA

h. Potato Engineering & Technology Research Center, Inner Mongolia University, Hohhot, China

i. Center for Plant Science Innovation, University of Nebraska, Lincoln, NE

j. USDA/ARS, Genetic Improvement of Fruits and Vegetables Laboratory, Beltsville, MD

k. Department of Agricultural Sciences, Viikki Plant Science Centre, University of Helsinki, Helsinki, Finland

l. Center for Genomics Enabled Plant Science, Michigan State University, East Lansing, MI

1. PPE and RV contributed equally to this work

2. Author for correspondence: [sjknapp@ucdavis.edu](mailto:sjknapp@ucdavis.edu) or [edgerpat@msu.edu](mailto:edgerpat@msu.edu)

## Abstract:

### Background

Although draft genomes are available for most agronomically important plant species, the majority are incomplete, highly fragmented, and often riddled with assembly and scaffolding errors. These assembly issues hinder advances in tool development for functional genomics and systems biology.

### Findings

Here we utilized a robust, cost-effective approach to produce high-quality reference genomes. We report a near-complete genome of diploid woodland strawberry (*Fragaria vesca*) using single-molecule real-time sequencing from Pacific Biosciences (PacBio). This assembly has a contig N50 length of ~7.9 million base pairs (Mb), representing a ~300 fold improvement of the previous version. The vast majority (>99.8%) of the assembly was anchored to seven pseudomolecules using two sets of optical maps from Bionano Genomics. We obtained ~24.96 Mb of sequence not present in the previous version of the *F. vesca* genome and produced an improved annotation that includes 1,496 new genes. Comparative syntenic analyses uncovered numerous, large-scale scaffolding errors present in each chromosome in the previously published version of the *F. vesca* genome.

### Conclusions

Our results highlight the need to improve existing short-read based reference genomes. Furthermore, we demonstrate how genome quality impacts commonly used analyses for addressing both fundamental and applied biological questions.

**Keyword:** *Fragaria vesca*, Strawberry, Rosaceae, Third-generation Sequencing, Optical Map

## Background Information:

Eukaryotic genomes, particularly plants, are notoriously difficult to assemble because of issues related to high repeat content, a history of gene and whole genome duplications, and regions of highly skewed nucleotide composition<sup>1</sup>. The short-reads (50-300 bp) generated by second generation sequencing technologies are often insufficient to resolve complex genomic features and regions. Short-reads are unable to span large repetitive regions resulting in sequence gaps and ambiguities in the assembly graph structures. Despite this known limitation, second generation sequencing platforms have been used for the majority of genome sequencing projects over the past decade resulting in a series of unfinished, fragmented draft genome assemblies<sup>2</sup>. For instance, the genome of woodland strawberry (*Fragaria vesca* 'Hawaii-4') was assembled using a mixture of different short read technologies and yielded 16,487 contigs in 3,263 scaffolds with an N50 length of ~27 kb<sup>3</sup>. Dense linkage maps were later utilized to split multiple chimeric scaffolds and improve anchoring to the seven pseudomolecules<sup>4</sup>. However, the *F. vesca* (version 2; V2) genome remains incomplete with 6.99% gaps, missing megabase-sized regions, and scaffolding errors.

*Fragaria vesca* serves as an important model system for genetic studies for the Rosaceae community, due to its small stature, short generation time, a simple and efficient system for genetic transformation, and an increasing number of genetic resources<sup>5-7</sup>. With more than 2,500 described species, Rosaceae is one of the most speciose eudicot families and includes a breadth of important crops (e.g. almonds, apples, apricots, blackberries, cherries, peaches, pears, plums, raspberries, roses and strawberries)<sup>8</sup>. Furthermore, *F. vesca* is a valuable genetic resource because it is the putative diploid progenitor of the A subgenome of the cultivated octoploid strawberry (*F. x ananassa*)<sup>9</sup>. Strawberries are of major economic importance worldwide with 373,435 hectares planted and 8,114,373 metric tonnes of fruit produced in 2014<sup>10</sup>. Previous versions of the *F. vesca* genome (V1 and V2) have been used to uncover underlying genetic factors regulating plant and fruit development, seasonal flowering, sex determination, metabolite diversity, and disease resistance<sup>11-16</sup>. A high-quality reference genome for *F. vesca* would further enable family-wide comparative studies and leverage the strengths offered by this model system for both fundamental and applied research.

We aimed to improve the *F. vesca* 'Hawaii-4' reference genome using a long-read PacBio single-molecule real-time (SMRT) sequencing approach. We generated 2.3 million PacBio reads collectively spanning 19.4 Gb (80.8x coverage) with a subread N50 length of 9.2 kb and average length of 8.3 kb (Supplemental Figure 1; NCBI BioProject ID PRJNA383733). The minimum and maximum read lengths were 3kb and 72kb, respectively. The raw PacBio reads were error corrected and assembled using the Canu<sup>17</sup> assembler followed by two rounds of polishing with Quiver<sup>18</sup>. High coverage (~40x) Illumina data was aligned to the PacBio assembly and residual errors were corrected using Pilon<sup>19</sup>. After removing the complete chloroplast and mitochondrial genomes, the final assembly spanned 219 Mb across 61 contigs with an N50 length of 7.9 Mb. Half of the assembly is contained in the largest 9 contigs, including five that exceed 10 Mb. The assembly graph is relatively simple with few ambiguities excluding a small cluster of five contigs corresponding to rRNA gene arrays from the nucleolar

1  
2  
3  
4 organizer region (Supplemental Figure 2). This represents a ~300 fold improvement in  
5 contiguity compared to the Illumina and 454 based *F. vesca* V1 assembly<sup>3</sup>.  
6  
7

8 The PacBio based contigs were anchored into a chromosome-scale assembly using a  
9 two-enzyme BioNano Genomics optical map. Contigs were scaffolded first using the BsqQI  
10 map and this hybrid assembly was used as a reference for the BssSI map. Incongruences  
11 between the genome assembly and optical map were screened using a hybrid scaffold  
12 algorithm from BioNano Genomics and manual curation, which resulted in a total of seven cuts  
13 made to input contigs and a single cut made to the optical map. Furthermore, Structural  
14 Variation detection between the BspQI assembly and the final output detected no major conflicts  
15 within the optical map resolution range. The combined BioNano and PacBio assembly spans  
16 220.8 Mb across 31 scaffolds with an N50 length of 36.1 Mb and 99.8% of the assembly  
17 captured in 9 scaffolds (Supplemental Table 1). Five of the seven *F. vesca* chromosomes are  
18 complete and two chromosomes were assembled into chromosome arms. The two pairs of  
19 chromosome arms were anchored using support from genetic maps<sup>3</sup>. The PacBio and BioNano  
20 assembly (hereon referred to as *F. vesca* V4) captures ~24.96 Mb of additional sequences with  
21 significant improvements in contiguity. The average gap size in the V2 assembly is >1kb. Nearly  
22 all of these gaps, totally ~17Mb of missing sequence (i.e. Ns), in the V2 assembly were filled.  
23 It's difficult to assess the exact number of gaps that were filled due to the drastic improvement  
24 of the V4 assembly. A total of 37 gaps remain in the V4 assembly after BNG hybrid scaffolding,  
25 including 23kb of missing sequence with an average gap size of 621bp. These gaps likely  
26 correspond to highly complex, repetitive regions that are difficult to assemble. These gaps may  
27 also include unanchored sequences that had no label sites in the BNG optical maps.  
28  
29  
30  
31  
32  
33  
34

35 *F. vesca* V4 has nine terminal telomere tracks with sequence and genome map support  
36 (**Figure 1**, Supplemental Figure 3), suggesting that the assembly is largely complete. Tandem  
37 arrays of centromeric repeats with monomeric lengths of 140, 143, and 147 bp were found in all  
38 seven chromosomes, consistent with previous findings<sup>3</sup>. *F. vesca* V4 contains three nucleolus  
39 organizer regions (NOR) at the beginning of Fvb1 and Fvb7 and at the end of Fvb5, consistent  
40 with previous cytological observations<sup>20</sup>. NOR rRNA arrays are complete on Fvb1 and Fvb5, but  
41 fragmented on Fvb7, based on sequence and genome map support. The 5S rRNA array is  
42 located 5 Mb upstream of the NOR on Fvb7 (Supplemental Figure 4).  
43  
44  
45  
46

47 A whole genome comparison of *F. vesca* V4 to V2<sup>4</sup> uncovered numerous, large-scale  
48 scaffolding errors made in each of the chromosomes in the previous version (**Figure 2**). The  
49 overall quality of the *F. vesca* V4 assembly, compared to V2, is also supported by the  
50 distribution pattern of DNA methylation across chromosomes (Supplemental Figure 5). These  
51 types of errors considerably hinder various genomic analyses, including fine-mapping genes  
52 underlying traits<sup>21</sup> and identifying structural variants via comparative genomics. Here we  
53 demonstrate the superior quality of *F. vesca* V4 by making comparisons to a high-density  
54 linkage map of *Fragaria iinumae*<sup>22</sup>, which is another putative diploid progenitor species of the  
55 cultivated octoploid strawberry. The total number of collinear markers against the *F. iinumae*  
56 genetic map increased by over 10% using *F. vesca* V4, compared to V2, and identified a  
57  
58  
59  
60  
61  
62  
63  
64  
65

1  
2  
3  
4 distinctive chromosomal inversion between the two species near the pericentromeric region on  
5 chromosome 3 (Supplemental Figure 6, Supplemental Table 2, Table S1).  
6

7  
8 Although the quality of previous annotations of the *F. vesca* genome<sup>3,23</sup> is comparable to other  
9 annotations of short-read assemblies, they are, unavoidably, incomplete and fragmented resulting  
10 in errors in gene identification and gene number predictions<sup>24</sup>. Thus, despite the increasing  
11 volume of transcript and protein sequence information generated from various experimental  
12 studies, the task of improving genome annotation of such genomes remains a major challenge.  
13 Using the MAKER-P annotation pipeline (MAKER, RRID:SCR\_005309)<sup>25</sup>, publicly available  
14 transcriptome data of *F. vesca*, and protein sequences from *Arabidopsis thaliana* and the  
15 UniprotKB database as evidence, we identified 28,588 gene models in *F. vesca* V4, of which  
16 70% have a known Pfam domain, and 27,491 are supported by RNA-seq data. The mean length  
17 of the predicted genes is 1,475 bp (Supplemental Table 3). Repetitive elements were annotated,  
18 including long terminal repeat retrotransposons (LTR-RTs) (e.g., *gypsy* and *copia*; **Figure 1**),  
19 non-LTR retrotransposons, and DNA transposons, using RepeatModeler (RepeatModeler,  
20 RRID:SCR\_015027)<sup>26</sup>, MITE\_Hunter<sup>27</sup>, and LTR\_retriever<sup>28</sup>. Most repetitive elements are  
21 unassembled, incomplete or collapsed in short-read based reference genomes, which results in  
22 the underestimation of the repeat content of most eukaryotic genomes<sup>29</sup>. The improvement in  
23 genome quality of *F. vesca* V4 permitted the identification of additional LTR-RTs  
24 (Supplemental Table 4). Furthermore, an analysis of the insertion times of each LTR-RTs  
25 indicates that there were two major LTR-RT bursts; approximately 1.8 and 1.2 million years  
26 before present (Supplemental Figure 7). Organellar genomes from the plastid and mitochondrion  
27 were also annotated and verified for completeness (Supplemental Figures 8-9).  
28  
29  
30  
31  
32

33  
34 The Benchmarking Universal Single-Copy Orthologs V2 (BUSCO, RRID:SCR\_015008)<sup>30</sup>  
35 method was used to estimate the completeness of genome assembly and quality of gene  
36 annotation of *F. vesca* V4. The majority (95%) of the 1,440 core genes in the embryophyta  
37 dataset were identified in the annotation, which is supportive of a high-quality assembly and  
38 annotation similar to other high-quality grade genomes<sup>31-33</sup>. The overall quality of the annotation  
39 is further supported by the distribution of DNA methylation across the gene bodies (**Figure 3**).  
40 The *F. vesca* V4 annotation shows much sharper distribution patterns, especially in the CG  
41 context, and lower CHG and CHH (where H=A, T or C) methylation in the gene bodies. These  
42 patterns are expected for annotations that are more accurate and contain fewer mis-annotations  
43 (e.g., pseudogenes, transposons, etc). Additionally, *F. vesca* V4 contains 1,496 newly predicted  
44 gene models, with a mean length of 1,505 bp, that were not present in all previous versions of  
45 the annotation<sup>3,23</sup>. The vast majority of these new genes (1,463 total) are expressed in different  
46 fruit tissues and developmental stages (**Figure 4**; Table S2). These newly identified genes  
47 either resided within the gaps in the V2 assembly or were collapsed tandem duplicates in the  
48 previous V1 assembly. Thus, previous expression studies may have missed key genes  
49 controlling fruit development and maturation in *F. vesca*<sup>34,35</sup>. Of the new genes in *F. vesca* V4,  
50 810 genes did not show similarity at the protein level (query length < 30%, E= 10<sup>-10</sup>) to any  
51 paralogs in the V2 genome but exhibit unique expression patterns (**Figure 4**). We also identified  
52 significantly more tandemly duplicated genes and larger tandem arrays in *F. vesca* V4  
53 (Supplemental Figure 10). Long-read single molecule sequencing approaches have been  
54 shown to better resolve tandemly repeated copies<sup>36-38</sup>. The identification of tandemly duplicated  
55  
56  
57  
58  
59  
60  
61  
62  
63  
64  
65

1  
2  
3  
4 genes is important since such genes are known to be highly enriched for both abiotic and biotic  
5 stress related functions<sup>39</sup>. For example, many important plant defense genes, including  
6 nucleotide-binding site leucine-rich repeat (*NBS-LRR*)<sup>40</sup> and cytochrome p450s (*CYPs*)<sup>41</sup>, are  
7 tandemly duplicated and exhibit high levels of copy number variation within a species.  
8  
9

10  
11 Here we present one of the most complete and contiguous plant genomes assembled to  
12 date. The average published plant genome is highly fragmented with a contig N50 length of  
13 roughly 50kb<sup>2</sup>, compared to ~7.9Mb for *F. vesca* V4. The *F. vesca* V4 genome has the third best  
14 contig N50 of any angiosperm sequenced to date, after only *Arabidopsis thaliana*<sup>42</sup> and *rice*  
15 (*Oryza sativa*)<sup>43</sup>. It is important to note that the total cost for a PacBio sequenced and BioNano  
16 Genomics genome is a very small fraction of the cost compared to these Sanger era  
17 genomes<sup>31</sup>. Our genomic analyses, which included direct comparisons to previously published  
18 versions (V1 and V2) of the same genotype<sup>3,4,23</sup>, highlight the need to improve existing short-  
19 read based reference genomes. The approach used here, combining long-read sequencing and  
20 optical maps, correct mis-assembly and scaffolding errors commonly found in short-read based  
21 genomes, which dramatically impact the results in genetic mapping (Supplemental Figure 6),  
22 methylation (**Figure 3**), and gene expression studies (**Figure 4**).  
23  
24  
25  
26  
27  
28

29 **Availability of supporting data:** The genome assembly, annotations, and other supporting  
30 data are available via the *GigaScience* database GigaDB<sup>48</sup>. The *F. vesca* V4 assembly and  
31 annotation will also be made publicly available on *Genome Database for Rosaceae*<sup>49</sup> and the  
32 *CyVerse CoGe* platform<sup>50</sup>. The raw sequence data have been deposited in the Short Read  
33 Archive (SRA) under NCBI BioProject ID PRJNA383733.  
34  
35

36 **Abbreviations:** bp: base pair; kb: kilo base; Mb: mega base; TE: transposable element;  
37 BUSCO: benchmarking universal single-copy orthologs; rRNA: ribosomal RNA; LTR-RT: long  
38 terminal repeat retrotransposons; NOR: nucleolus organizer regions  
39  
40

41 **Acknowledgements:** We thank the reviewers and Editor for their helpful comments during the  
42 review of this manuscript. This work was supported by Michigan State University  
43 AgBioResearch to PPE, USDA-NIFA HATCH 1009804 to PPE, NSF MCB-1121650 to NJ,  
44 USDA-NIFA SCRI 2017-51181-26833 to SJK, California Strawberry Commission to SJK, and  
45 University of California to SJK.  
46  
47  
48  
49

50 **Competing Interests:** The authors declare that they have no competing interests.  
51  
52

53 **Author Contributions:** P.P.E., R.V. and S.J.K. designed research; P.P.E., R.V., M.C., T.J.P.,  
54 C.M.W., C.E.N., E.A., S.O., C.B.A., J.W., P.C., M.R.M., J.S., C.C., Z.X., J.P.M., J.P.S., T.H.,  
55 N.J., K.L.C., and S.J.K. performed research and/or analyzed data; and P.P.E., R.V., M.C., E.A.  
56 and S.J.K wrote the paper. All authors reviewed the manuscript.  
57  
58  
59  
60  
61  
62  
63  
64  
65



1  
2  
3  
4  
5  
6  
7  
8  
9  
10  
11  
12  
13  
14  
15  
16  
17  
18  
19  
20  
21  
22  
23  
24  
25  
26  
27  
28  
29  
30  
31  
32  
33  
34  
35  
36  
37  
38  
39  
40  
41  
42  
43  
44  
45  
46  
47  
48  
49  
50  
51  
52  
53  
54  
55  
56  
57  
58  
59  
60  
61  
62  
63  
64  
65

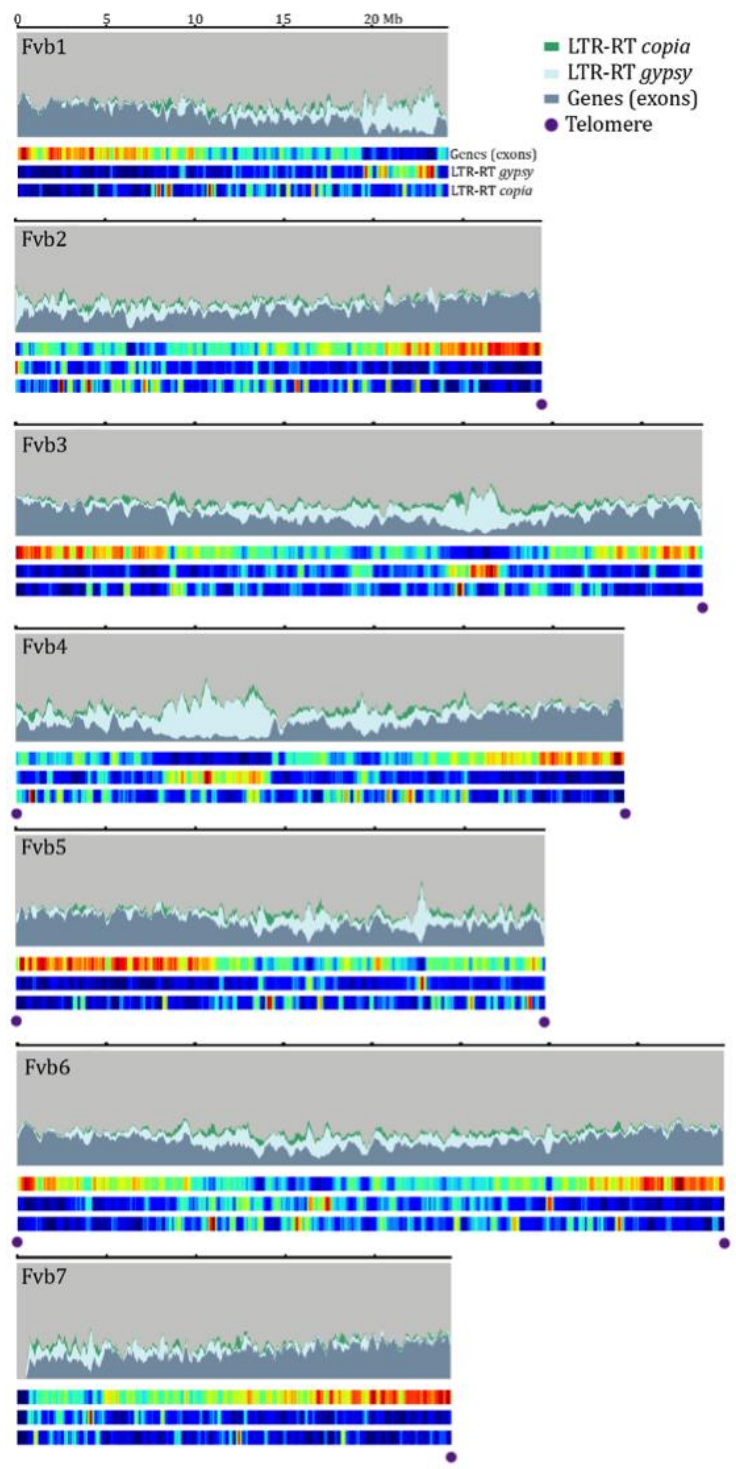

**Figure 1. Chromosome landscapes of the *F. vesca* V4 genome**  
The distribution of genes and long terminal repeat retrotransposons (LTR-RTs) are plotted for each of the seven chromosomes. Heatmaps reflect the distribution of elements with blue

1  
2  
3  
4 indicating the lowest abundance and red signifying high abundance. Plots were generated with  
5 sliding window of 50kb with 10kb shift across each chromosome. Terminal telomeric repeat  
6 arrays are denoted in purple.  
7  
8

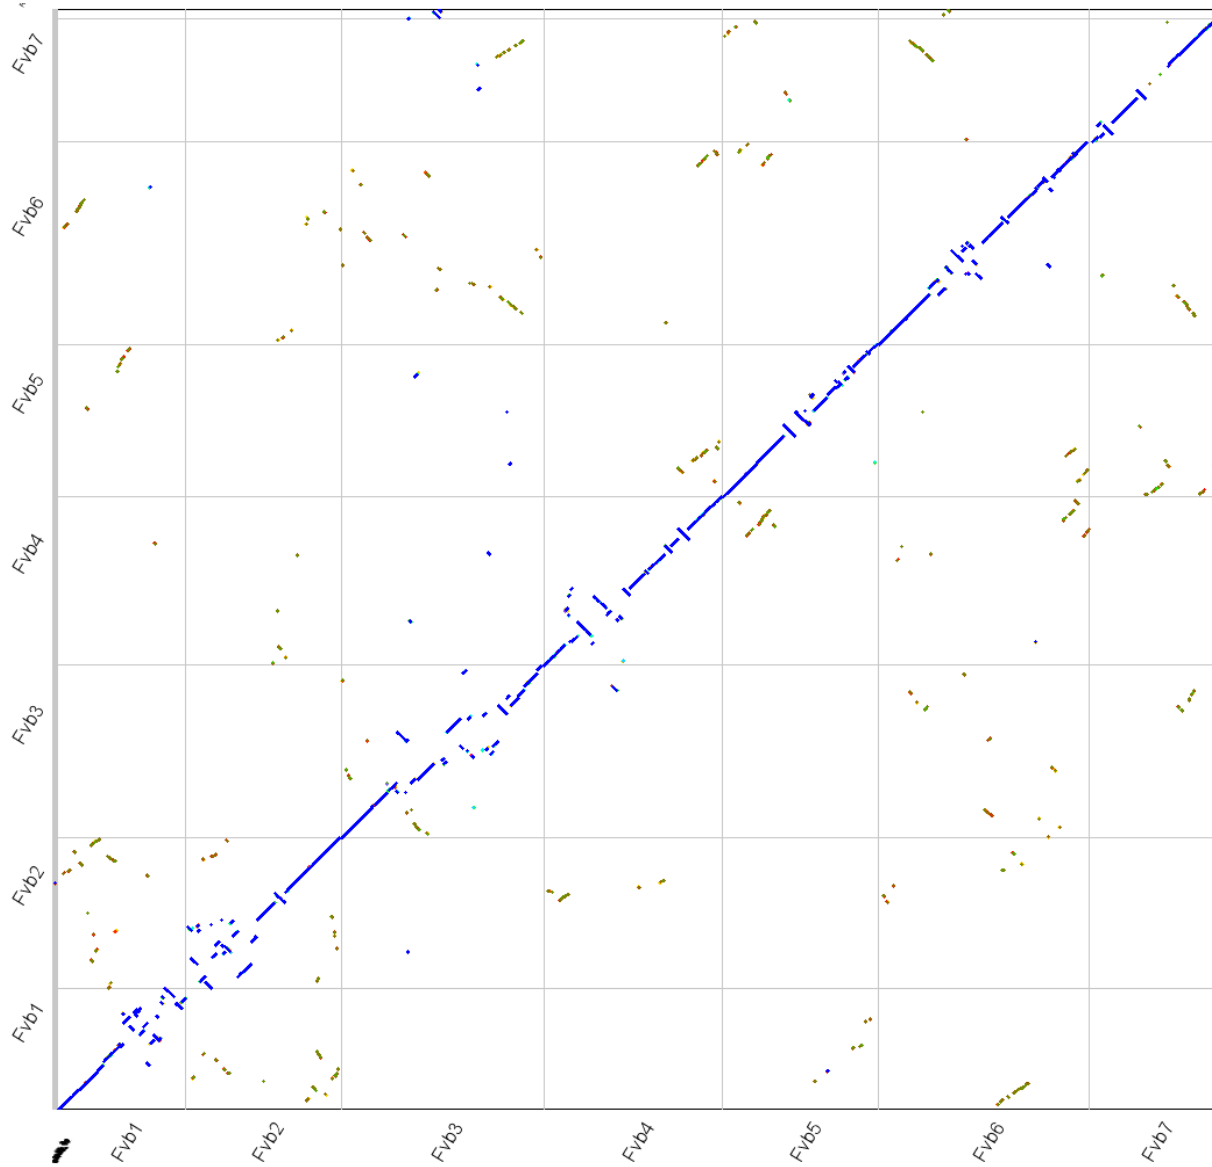

50 **Figure 2. Macrosyntentic comparison of the V2 and V4 *F. vesca* assemblies**

51 Syntenic gene pairs between V4 (x-axis) and V2 (y-axis) of *F. vesca* were identified by  
52 DAGChainer<sup>44</sup>, sorted by chromosome (Fvb1-7), and colored based on their synonymous  
53 substitution rate as calculated by CodeML<sup>45</sup> using SynMap within CoGe<sup>46</sup>. Syntenic  
54 ‘orthologous’ regions are colored in blue and duplicated genes retained from a whole genome  
55 triplication event (At-gamma<sup>47</sup>) in other colors. Regions that were misassembled and incorrectly  
56 scaffolded in *F. vesca* V2 are identified by negatively sloped and repositioned lines.  
57  
58  
59  
60  
61  
62  
63  
64  
65

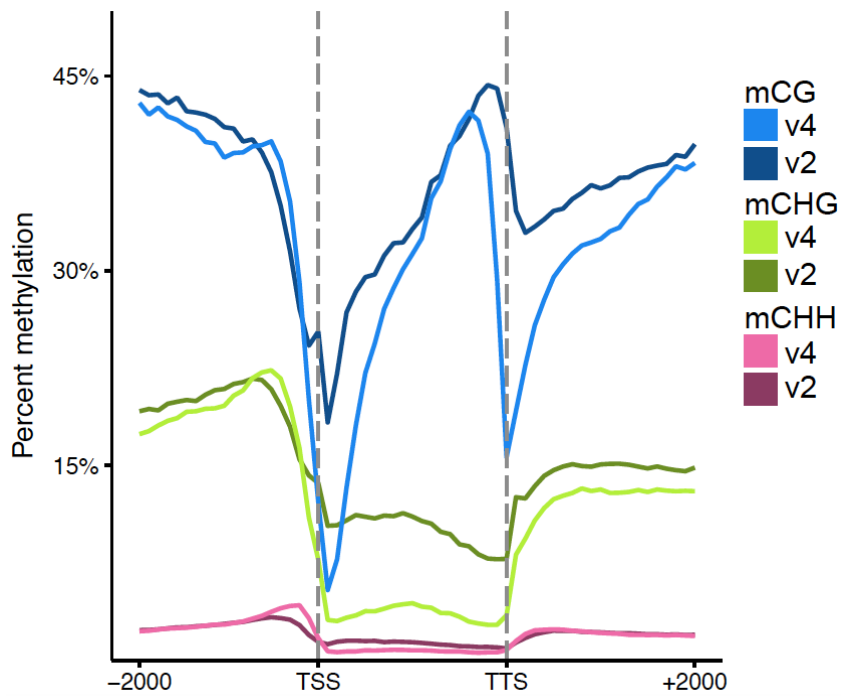

**Figure 3: Distribution of gene body methylation in the V2 and V4 *F. vesca* assemblies.**

This plot shows the average DNA methylation patterns (CG = Blue, CHG = Green, CHH = Red; H=A, T or C) across all genes in the V2 (darker colors) and V4 (lighter colors) assemblies. The X-axis shows the transcription start sites (TSS, left dashed line) and the transcription termination sites (TTS, right dashed line), plus +/- 2000 bp from each gene.

1  
2  
3  
4  
5  
6  
7  
8  
9  
10  
11  
12  
13  
14  
15  
16  
17  
18  
19  
20  
21  
22  
23  
24  
25  
26  
27  
28  
29  
30  
31  
32  
33  
34  
35  
36  
37  
38  
39  
40  
41  
42  
43  
44  
45  
46  
47  
48  
49  
50  
51  
52  
53  
54  
55  
56  
57  
58  
59  
60  
61  
62  
63  
64  
65

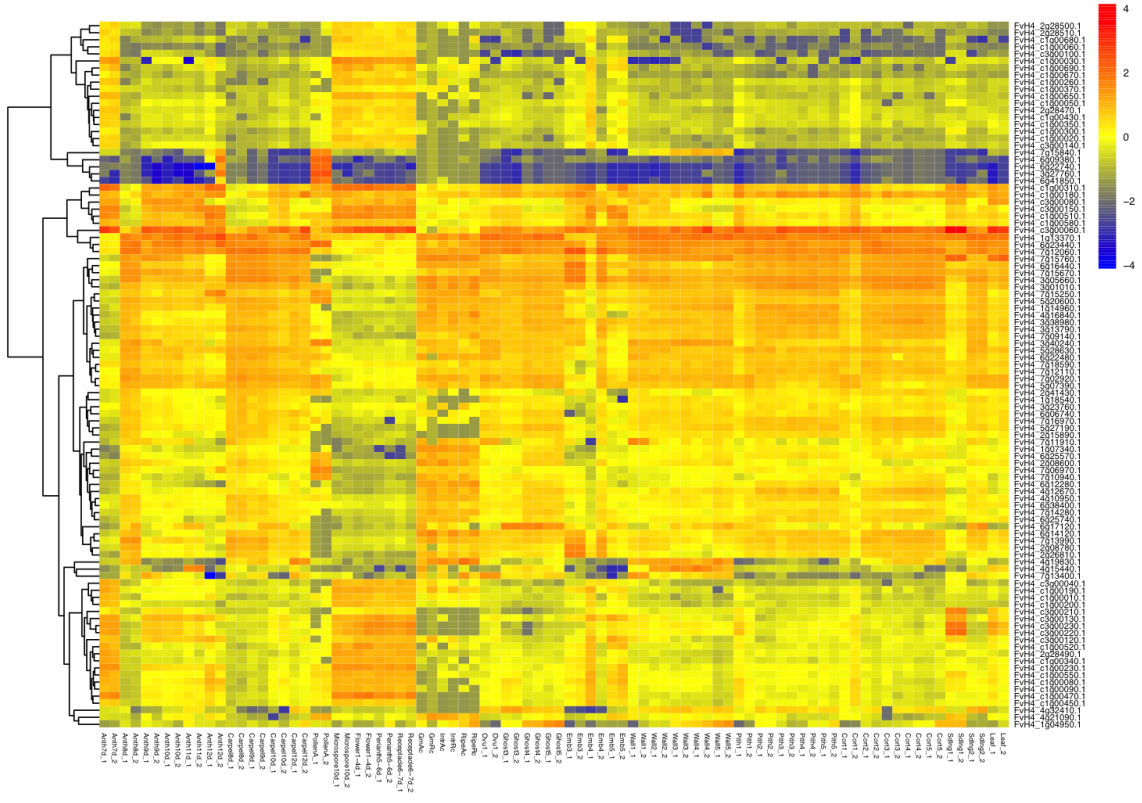

**Figure 4: Expression patterns of newly annotated genes across diverse tissue types**  
Heatmap consists of a random subset of 100 genes from the unique 810 newly identified genes in the *F. vesca* V4 assembly, across 22 tissue types at different developmental stages. Two biological replicates were sequenced per tissue with the exception of six with only one biological replicate each (Table S2). Blue indicates the lowest expression and red signifies the highest expression abundance. Gene expression level was calculated based on RPKM (Reads Per Kilobase of transcript per Million mapped reads) and visualized through heatmap analysis using variance stabilized transformed values on a log<sub>2</sub> scale.

## References

1. Schatz, M. C., Witkowski, J. & McCombie, W. R. Current challenges in *de novo* plant genome sequencing and assembly. *Genome Biol.* **13**, (2012).
2. Michael, T. P. & VanBuren, R. Progress, challenges and the future of crop genomes. *Curr. Opin. Plant Biol.* **24**, 71–81 (2015).
3. Shulaev, V. *et al.* The genome of woodland strawberry (*Fragaria vesca*). *Nat. Genet.* **43**, 109–116 (2011).
4. Tennesen, J. A., Govindarajulu, R., Liston, A. & Ashman, T.-L. Targeted Sequence Capture Provides Insight into Genome Structure and Genetics of Male Sterility in a Gynodioecious Diploid Strawberry, *Fragaria vesca* ssp *bracteata* (Rosaceae). *G3* **3**, 1341–1351 (2013).
5. Folta, K. M. & Davis, T. M. Strawberry genes and genomics. *CRC Crit. Rev. Plant Sci.* **25**, 399–415 (2006).
6. Liston, A., Cronn, R. & Ashman, T.-L. *Fragaria*: A genus with deep historical roots and ripe for evolutionary and ecological insights. *Am. J. Bot.* **101**, 1686–1699 (2014).
7. Slovin, J. P. & Michael, T. P. Strawberry Part 3-structural and functional genomics. *Genetics, genomics and breeding of berries* 240–308 (2011).
8. Shulaev, V. *et al.* Multiple models for Rosaceae genomics. *Plant Physiol.* **147**, 985–1003 (2008).
9. Senanayake, Y. D. & Bringham, R. S. Origin of *Fragaria* Polyploids. I. Cytological Analysis. *Am. J. Bot.* **54**, 221 (1967).
10. Faostat, F. Agriculture Organization of the United Nations Statistics Division (2014). Production Available in: <http://faostat3.fao.org/browse/Q/QC/S> [Review date: April 2015] (2016).
11. Ashman, T.-L. *et al.* Multilocus Sex Determination Revealed in Two Populations of Gynodioecious Wild Strawberry, *Fragaria vesca* subsp. *bracteata*. *G3* **5**, 2759–2773 (2015).
12. Koskela, E. *et al.* Mutation in *TERMINAL FLOWER1* reverses the photoperiodic requirement for flowering in the wild strawberry, *Fragaria vesca*. *Plant Phys.* **159**, 1043–1054 (2012).
13. Naithani, S., Partipilo, C. M., Raja, R., Elser, J. L. & Jaiswal, P. *FragariaCyc*: A Metabolic Pathway Database for Woodland Strawberry *Fragaria vesca*. *Front. Plant Sci.* **7**, 242 (2016).
14. Tennesen, J. A., Govindarajulu, R., Liston, A. & Ashman, T.-L. Homomorphic ZW chromosomes in a wild strawberry show distinctive recombination heterogeneity but a small sex-determining region. *New Phytol.* **211**, 1412–1423 (2016).
15. Wei, W. *et al.* The WRKY transcription factors in the diploid woodland strawberry *Fragaria vesca*: Identification and expression analysis under biotic and abiotic stresses. *Plant Physiol. Biochem.* **105**, 129–144 (2016).
16. Chen, X.-R., Brurberg, M. B., Elameen, A., Klemsdal, S. S. & Martinussen, I. Expression of resistance gene analogs in woodland strawberry (*Fragaria vesca*) during infection with *Phytophthora cactorum*. *Mol. Genet. Genomics* **291**, 1967–1978 (2016).
17. Koren, S. *et al.* Canu: scalable and accurate long-read assembly via adaptive k-mer weighting and repeat separation. *Genome Res.* (2017). doi:10.1101/gr.215087.116

18. Chin, C.-S. *et al.* Nonhybrid, finished microbial genome assemblies from long-read SMRT sequencing data. *Nat. Methods* **10**, 563 (2013).
19. Walker, B. J. *et al.* Pilon: An Integrated Tool for Comprehensive Microbial Variant Detection and Genome Assembly Improvement. *PLoS One* **9**, (2014).
20. Liu, B. & Davis, T. M. Conservation and loss of ribosomal RNA gene sites in diploid and polyploid *Fragaria* (Rosaceae). *BMC Plant Biol.* **11**, (2011).
21. Samad, S. *et al.* Additive QTLs on three chromosomes control flowering time in woodland strawberry (*Fragaria vesca* L.). *Hort. Res.*, in press (2017).
22. Mahoney, L. L. *et al.* A High-Density Linkage Map of the Ancestral Diploid Strawberry, *Fragaria iinumae*, Constructed with Single Nucleotide Polymorphism Markers from the IStraw90 Array and Genotyping by Sequencing. *Plant Genome* **9**, (2016).
23. Darwish, O., Shahan, R., Liu, Z., Slovin, J. P. & Alkharouf, N. W. Re-annotation of the woodland strawberry (*Fragaria vesca*) genome. *BMC Genomics* **16**, (2015).
24. Yandell, M. & Ence, D. A beginner's guide to eukaryotic genome annotation. *Nat. Rev. Genet.* **13**, 329–342 (2012).
25. Campbell, M. S. *et al.* MAKER-P: A Tool Kit for the Rapid Creation, Management, and Quality Control of Plant Genome Annotations. *Plant Physiol.* **164**, 513–524 (2014).
26. Smit, A. & Hubley, R. RepeatModeler Open-1.0. *Repeat Masker Website* (2010).
27. Han, Y. & Wessler, S. R. MITE-Hunter: a program for discovering miniature inverted-repeat transposable elements from genomic sequences. *Nucleic Acids Res.* **38**, e199 (2010).
28. Ou, S. & Jiang, N. LTR\_retriever: a highly accurate and sensitive program for identification of LTR retrotransposons. In Preparation.
29. de Koning, A. P. J., Gu, W., Castoe, T. A., Batzer, M. A. & Pollock, D. D. Repetitive Elements May Comprise Over Two-Thirds of the Human Genome. *PLoS Genet.* **7**, (2011).
30. Simão, F. A., Waterhouse, R. M., Ioannidis, P., Kriventseva, E. V. & Zdobnov, E. M. BUSCO: assessing genome assembly and annotation completeness with single-copy orthologs. *Bioinformatics* **31**, 3210–3212 (2015).
31. VanBuren, R. *et al.* Single-molecule sequencing of the desiccation-tolerant grass *Oropetium thomaeum*. *Nature* **527**, 508–U209 (2015).
32. Jarvis, D. E. *et al.* The genome of *Chenopodium quinoa*. *Nature* **542**, 307 (2017).
33. Bickhart, D. M. *et al.* Single-molecule sequencing and chromatin conformation capture enable *de novo* reference assembly of the domestic goat genome. *Nat. Genet.* **49**, 643 (2017).
34. Hollender, C. A., Geretz, A. C., Slovin, J. P. & Liu, Z. Flower and early fruit development in a diploid strawberry, *Fragaria vesca*. *Planta* **235**, 1123–1139 (2012).
35. Kang, C. *et al.* Genome-Scale Transcriptomic Insights into Early-Stage Fruit Development in Woodland Strawberry *Fragaria vesca*. *Plant Cell* **25**, 1960–1978 (2013).
36. Krsticevic, F. J., Schrago, C. G. & Carvalho, A. B. Long-Read Single Molecule Sequencing to Resolve Tandem Gene Copies: The *Mst77Y* Region on the *Drosophila melanogaster* Y Chromosome. *G3* **5**, 1145–1150 (2015).
37. Torresen, O. K. *et al.* An improved genome assembly uncovers prolific tandem repeats in Atlantic cod. *BMC Genomics* **18**, (2017).
38. Oren, M. *et al.* Short tandem repeats, segmental duplications, gene deletion, and genomic instability in a rapidly diversified immune gene family. *BMC Genomics* **17**, (2016).

- 1
- 2
- 3
- 4 39. Edger, P. P. & Pires, J. C. Gene and genome duplications: the impact of dosage-sensitivity
- 5 on the fate of nuclear genes. *Chromosome Res.* **17**, 699–717 (2009).
- 6
- 7 40. McHale, L., Tan, X. P., Koehl, P. & Michelmore, R. W. Plant NBS-LRR proteins: adaptable
- 8 guards. *Genome Biol.* **7**, (2006).
- 9
- 10 41. Hofberger, J. A., Lyons, E., Edger, P. P., Pires, J. C. & Schranz, M. E. Whole Genome and
- 11 Tandem Duplicate Retention Facilitated Glucosinolate Pathway Diversification in the
- 12 Mustard Family. *Genome Biol. Evol.* **5**, 2155–2173 (2013).
- 13
- 14 42. Kaul, S. *et al.* Analysis of the genome sequence of the flowering plant *Arabidopsis thaliana*.
- 15 *Nature* **408**, 796–815 (2000).
- 16
- 17 43. Matsumoto, T. *et al.* The map-based sequence of the rice genome. *Nature* **436**, 793–800
- 18 (2005).
- 19
- 20 44. Haas, B. J., Delcher, A. L., Wortman, J. R. & Salzberg, S. L. DAGchainer: a tool for mining
- 21 segmental genome duplications and synteny. *Bioinformatics* **20**, 3643–3646 (2004).
- 22
- 23 45. Yang, Z. PAML: a program package for phylogenetic analysis by maximum likelihood.
- 24 *Comput. Appl. Biosci.* **13**, 555–556 (1997).
- 25
- 26 46. Lyons, E., Pedersen, B., Kane, J. & Freeling, M. The Value of Nonmodel Genomes and an
- 27 Example Using SynMap Within CoGe to Dissect the Hexaploidy that Predates the Rosids.
- 28 *Trop. Plant Biol.* **1**, 181–190 (2008).
- 29
- 30 47. Bowers, J. E., Chapman, B. A., Rong, J. K. & Paterson, A. H. Unravelling angiosperm
- 31 genome evolution by phylogenetic analysis of chromosomal duplication events. *Nature* **422**,
- 32 433–438 (2003).
- 33
- 34 48. Edger P, VanBuren R, Colle M, Poorten TJ, Wai CM Niederhuth CE, *et al.* Supporting data
- 35 for "Single-molecule sequencing and optical mapping yields an improved genome of
- 36 woodland strawberry (*Fragaria vesca*) with chromosome-scale contiguity". *GigaScience*
- 37 Database 2017. <http://dx.doi.org/10.5524/100372>
- 38
- 39 49. GDR: Genome Database for Rosaceae. <https://www.rosaceae.org/>. Accessed 24 Nov
- 40 2017.
- 41
- 42 50 CoGe: Comparative Genomics. <https://genomeevolution.org/coge/>. Accessed 24 Nov 2017.
- 43
- 44
- 45
- 46
- 47
- 48
- 49
- 50
- 51
- 52
- 53
- 54
- 55
- 56
- 57
- 58
- 59
- 60
- 61
- 62
- 63
- 64
- 65

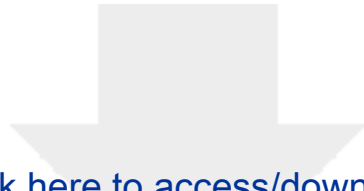

Click here to access/download

**Supplementary Material**

Supplement-H4GenomePaper\_Final3.docx

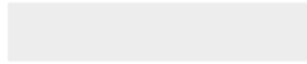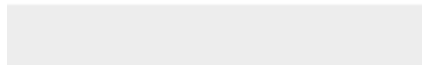



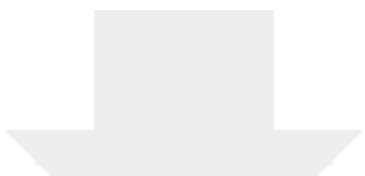

Click here to access/download  
**Supplementary Material**  
H4\_TableS1.xlsx



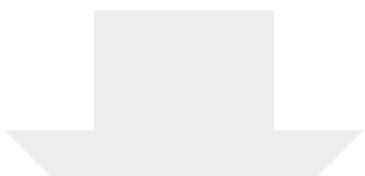

Click here to access/download  
**Supplementary Material**  
H4\_TableS2.xlsx



Supplement: gix124_giga-d-17-00135_revision_2.pdf [file gix124_giga-d-17-00135_revision_2.pdf]
