# Supplementary material for: Single-molecule sequencing and optical mapping yields an improved genome of woodland strawberry (Fragaria vesca) with chromosome-scale contiguity
Source: PubMed Central journal article supplement (PMC5801600; doi:10.1093/gigascience/gix124), 2017-12-13
Supplement: gix124_response_to_reviewer_comments_revision_1.pdf [file gix124_response_to_reviewer_comments_revision_1.pdf]

## **Author's Response To Reviewer Comments**

Dear Reviewers and Editor,

Thank you again for all of the helpful comments! The manuscript has been significantly improved thanks to you.

Pat
